# Supplementary material for: Amine functionalization of N,N,N′,N′-tetramethyl-p-phenylenediamine for the electrosynthesis of a wide range of p-phenylenediamines in green conditions
Source: Royal Society of Chemistry journal article supplement (doi:10.1039/d1nj02737a), 2021-01-01
Supplement: d1nj02737a1.pdf [file d1nj02737a1.pdf]

## Supporting Information

### **Amine functionalization of *N,N,N',N'*-tetramethyl-*p*-phenylenediamine applicable to electrosynthesis a wide range of *p*-phenylenediamines in green conditions**

Fahimeh Varmaghani<sup>\*a,b</sup>, Maryam Abbasi<sup>a</sup>

<sup>a</sup>Department of Chemistry, Institute for Advanced Studies in Basic Sciences (IASBS), Zanjan, 45137-66731, Iran

<sup>b</sup>Research Center for Basic Sciences & Modern Technologies (RBST), Institute for Advanced Studies in Basic Sciences (IASBS), Zanjan, 45137-66731, Iran.

Email: [f.varmaghani@iasbs.ac.ir](mailto:f.varmaghani@iasbs.ac.ir)

## Table of Contents

|                    |                                                                                    |      |
|--------------------|------------------------------------------------------------------------------------|------|
| <b>Figure S1.</b>  | CVs of NDPM in solutions with various pHs                                          | p.3  |
| <b>Figure S2.</b>  | CVs of NDPM during paired electrolysis at -0.6 V                                   | p.4  |
| <b>Figure S3.</b>  | $^{13}\text{C}$ NMR and DEPT $135^\circ$ $^{13}\text{C}$ NMR spectrum of <b>2a</b> | p.5  |
| <b>Figure S4.</b>  | Calculated natural charge of each atom in ADPM <sub>ox</sub>                       | p.6  |
| <b>Figure S5.</b>  | FT-IR spectrum of NDPM                                                             | p.7  |
| <b>Figure S6.</b>  | Experimental and simulated $^1\text{H}$ NMR spectrum of NDPM                       | p.8  |
| <b>Figure S7.</b>  | $^{13}\text{C}$ NMR spectrum of NDPM                                               | p.9  |
| <b>Figure S8.</b>  | Mass spectrum of NDPM                                                              | p.10 |
| <b>Figure S9.</b>  | FT-IR spectrum of <b>2a</b>                                                        | p.11 |
| <b>Figure S10.</b> | $^1\text{H}$ NMR spectrum of <b>2a</b>                                             | p.12 |
| <b>Figure S11.</b> | $^{13}\text{C}$ NMR spectrum of <b>2a</b>                                          | p.13 |
| <b>Figure S12.</b> | Mass spectrum of <b>2a</b>                                                         | p.14 |
| <b>Figure S13.</b> | FT-IR spectrum of <b>2b</b>                                                        | p.15 |
| <b>Figure S14.</b> | $^1\text{H}$ NMR spectrum of <b>2b</b>                                             | p.16 |
| <b>Figure S15.</b> | $^{13}\text{C}$ NMR spectrum of <b>2b</b>                                          | p.17 |
| <b>Figure S16.</b> | Mass spectrum of <b>2b</b>                                                         | p.18 |
| <b>Figure S17.</b> | FT-IR spectrum of <b>2c</b>                                                        | p.19 |
| <b>Figure S18.</b> | $^1\text{H}$ NMR spectrum of <b>2c</b>                                             | p.20 |
| <b>Figure S19.</b> | $^{13}\text{C}$ NMR spectrum of <b>2c</b>                                          | p.21 |
| <b>Figure S20.</b> | Mass spectrum of <b>2c</b>                                                         | p.22 |
|                    |                                                                                    |      |

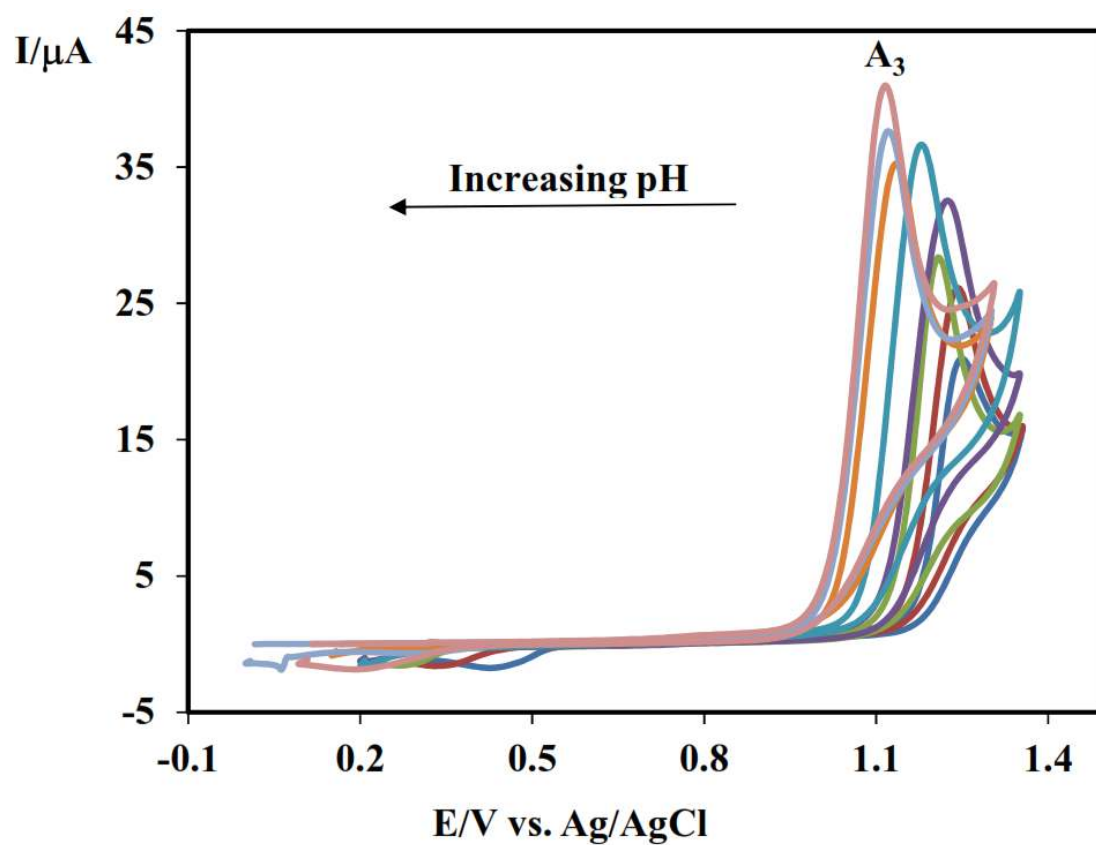

**Fig. S1.** Cyclic voltammograms of 0.4 mM **1** toward positive going scan in ethanol/ buffered solutions (1 ml ethanol/9 ml buffer) with various pH values; Scan rate: 100 mV s<sup>-1</sup>.

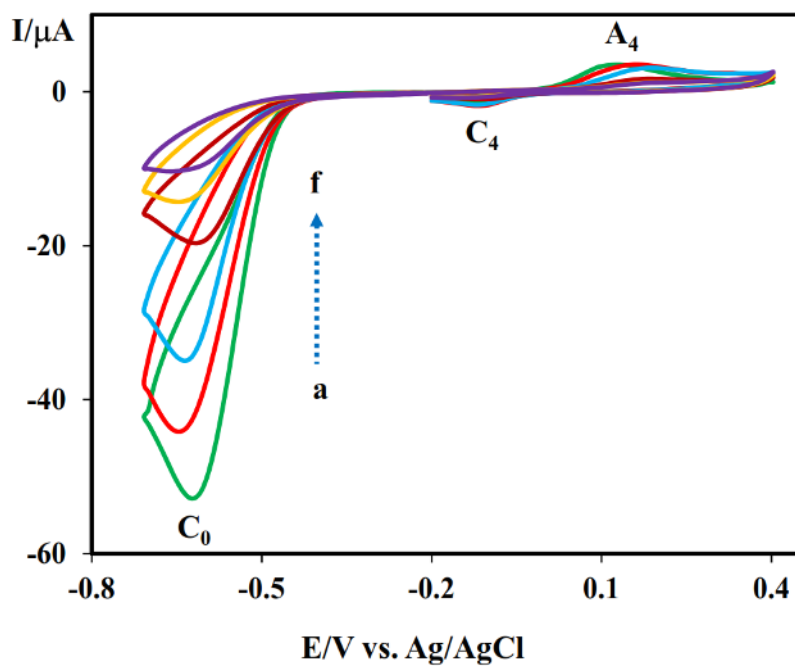

**Fig. S2.** Cyclic voltammograms of 0.125 mmol of **1** in the presence of 0.125 mmol **4-TSA** in ethanol/acetate buffered solutions (0.2 M, pH = 5.0) (20 mL ethanol/60 mL buffer solution), (a) to (f): progress of electrolysis.

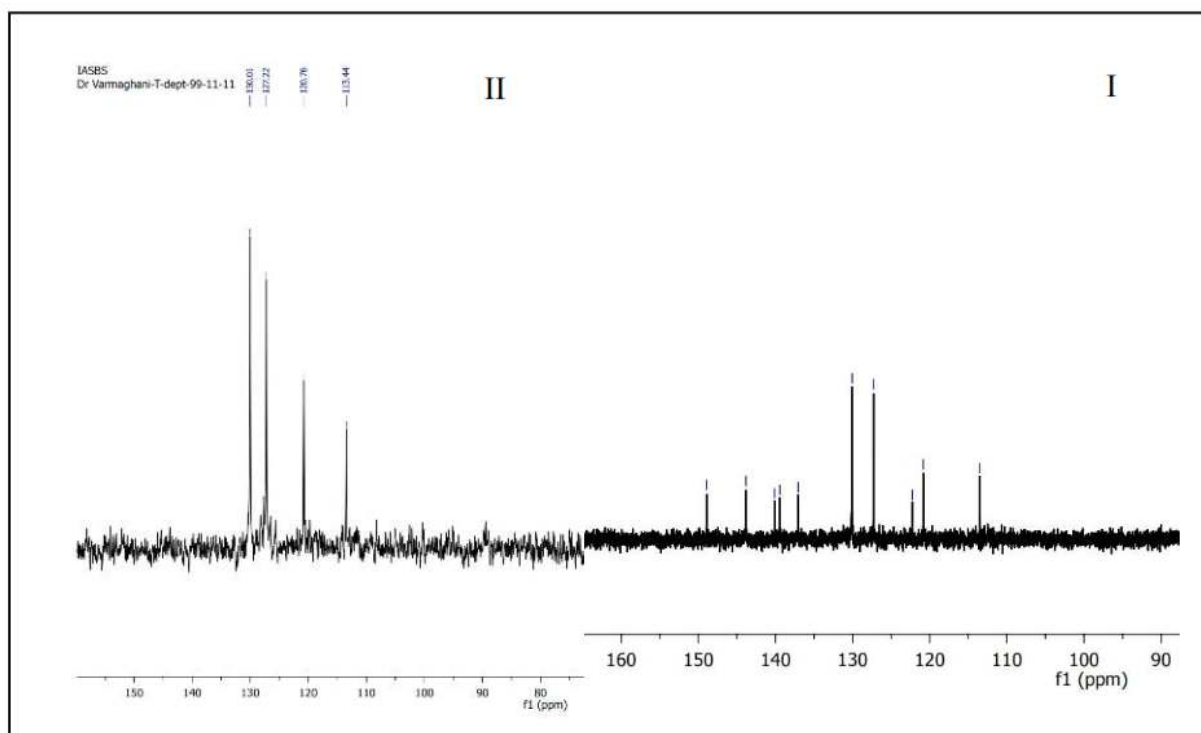

**Fig. S3.** I:  $^{13}\text{C}$  NMR and II: DEPT  $135^\circ$   $^{13}\text{C}$ NMR spectra of **2a**

| Atomic Number | Atom type | Charge   |
|---------------|-----------|----------|
| 1             | C         | -0.09478 |
| 2             | C         | -0.00915 |
| 3             | C         | 0.153914 |
| 4             | C         | -0.12924 |
| 5             | C         | 0.067916 |
| 6             | C         | -0.40797 |
| 7             | H         | 0.216627 |
| 8             | H         | 0.256257 |
| 9             | H         | 0.228252 |
| 10            | N         | 0.244173 |
| 11            | N         | -0.33294 |
| 12            | N         | 0.123167 |
| 13            | N         | -0.31512 |
| 14            | O         | 0.261419 |
| 15            | O         | 0.231905 |
| 16            | C         | -0.48314 |
| 17            | C         | -0.44068 |
| 18            | C         | -0.38849 |
| 19            | H         | 0.192497 |
| 20            | H         | 0.272697 |
| 21            | H         | 0.231077 |
| 22            | H         | 0.172979 |
| 23            | H         | 0.27697  |
| 24            | H         | 0.225565 |
| 25            | H         | 0.327888 |
| 26            | H         | 0.343031 |
| 27            | H         | 0.287113 |
| 28            | H         | 0.261173 |
| 29            | H         | 0.226884 |

**Fig. S4:** Calculated natural charge of each atom in ADPM<sub>ox</sub>

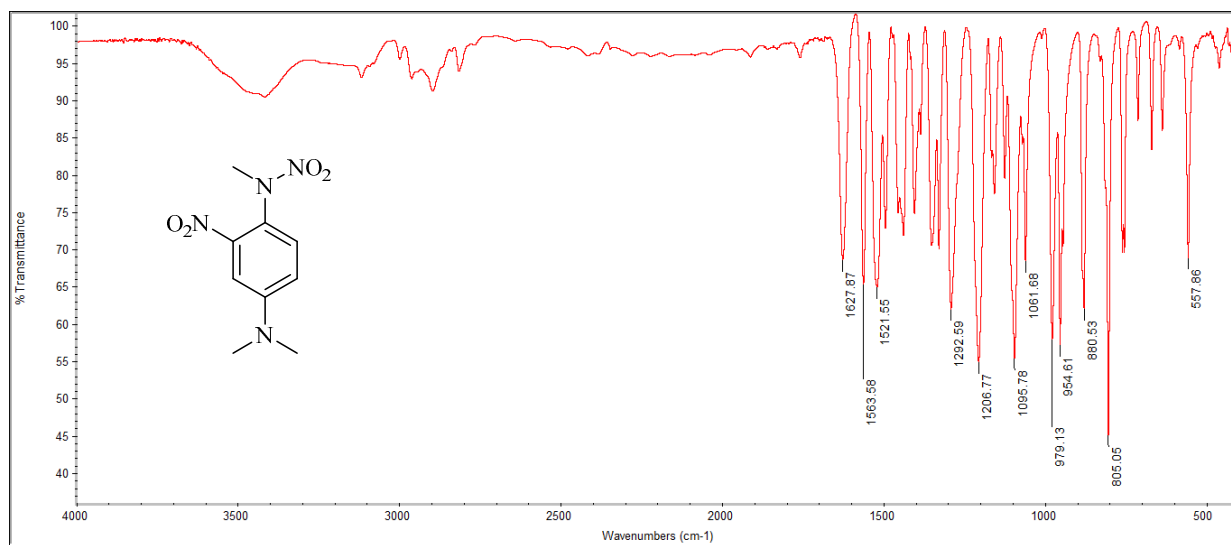

**Figure S5.** FT-IR spectrum of NDPM

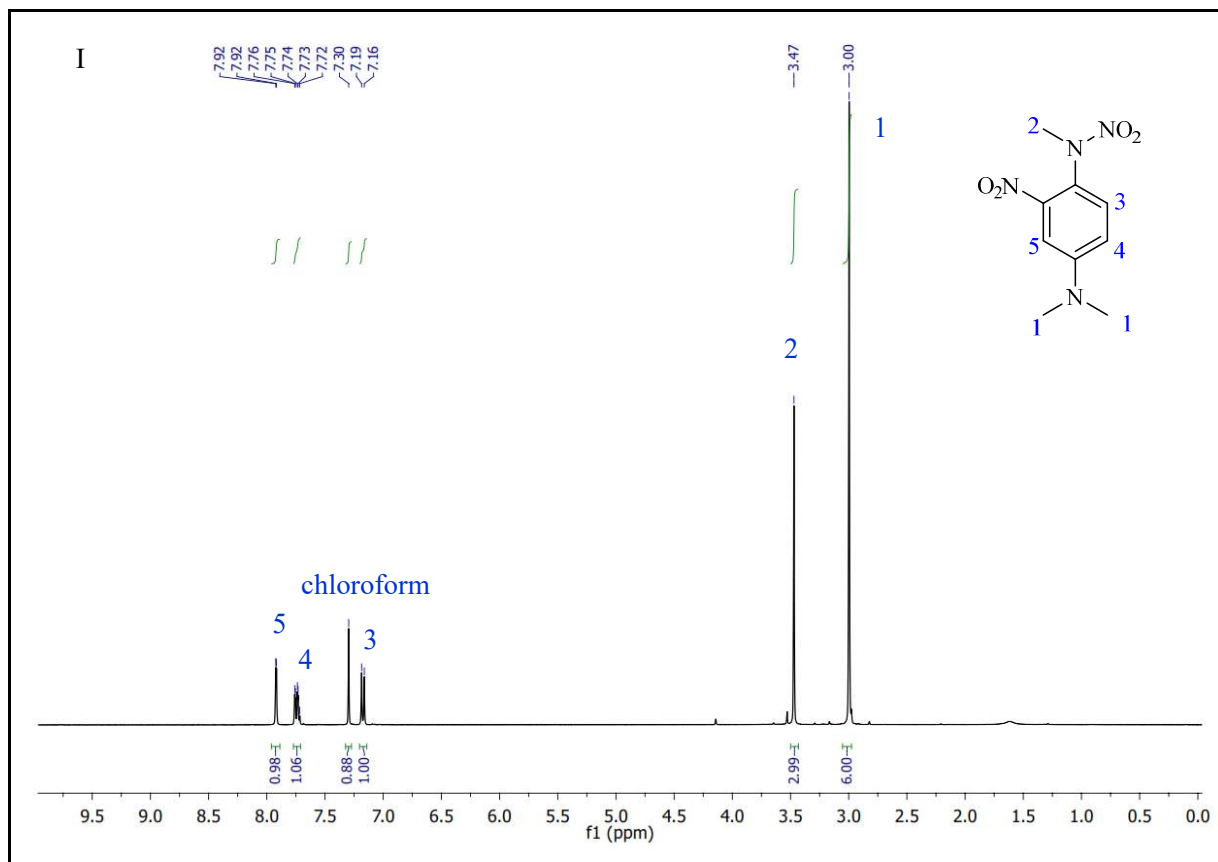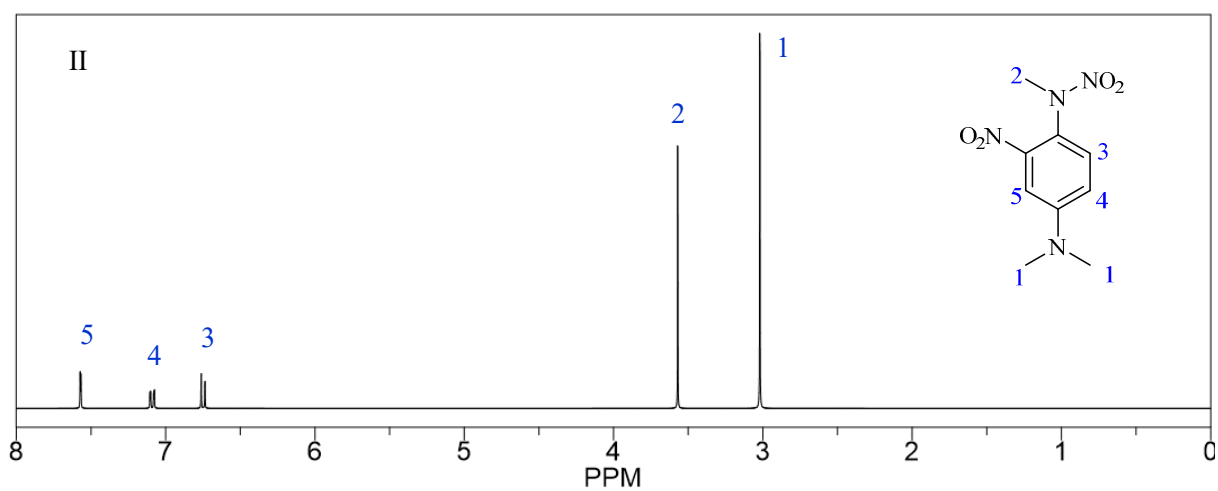

**Figure S6.** I: Experimental and II: simulated  $^1\text{H}$  NMR spectra of NDPM



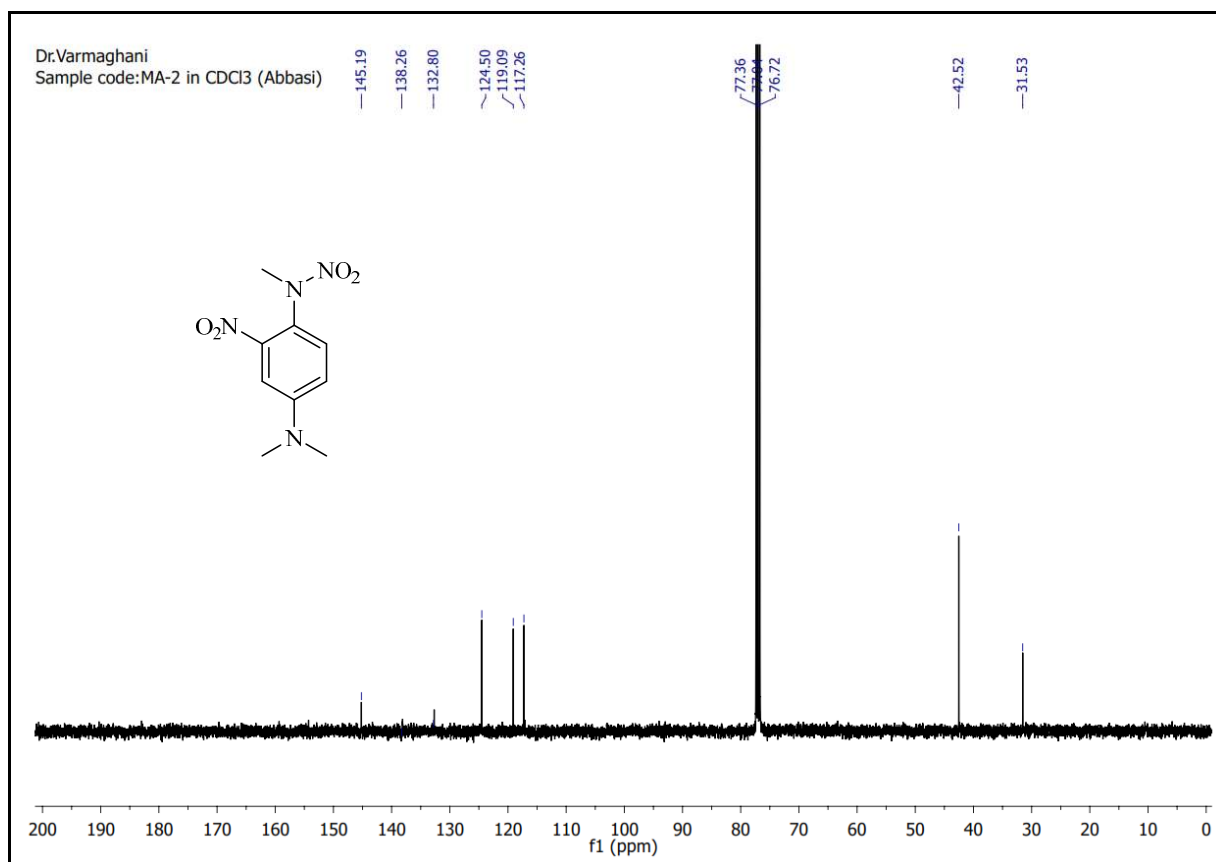

**Figure S7.** <sup>13</sup>C NMR spectrum of NDPM

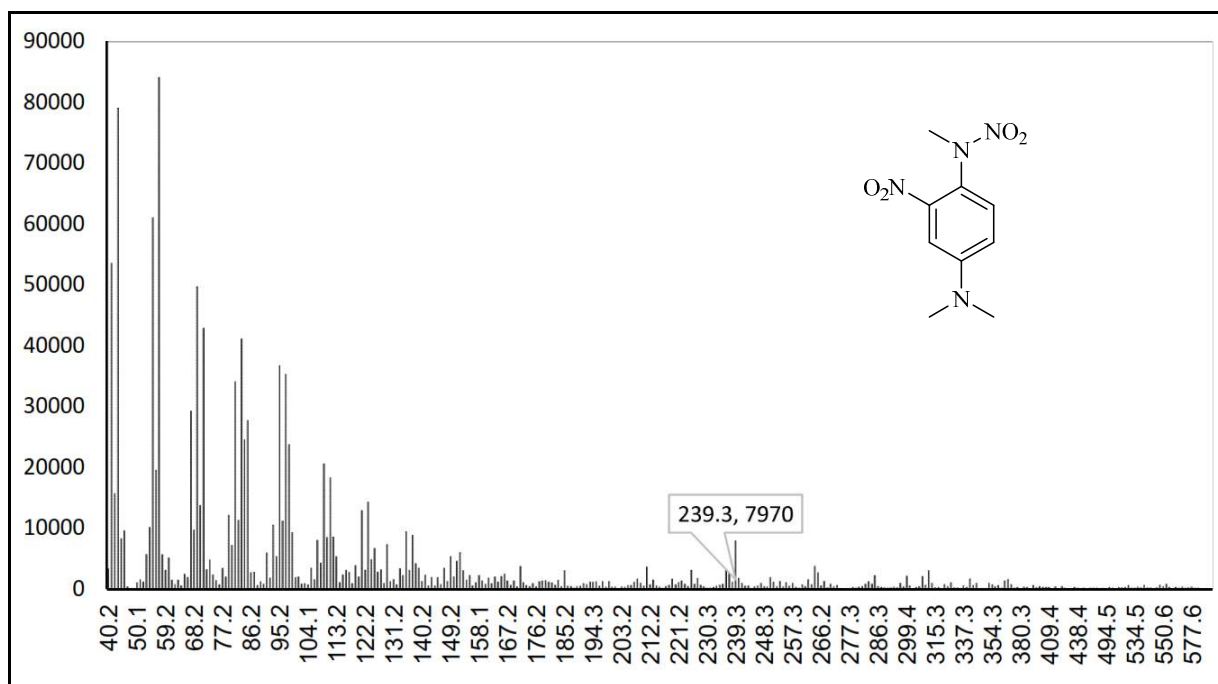

**Figure S8.** Mass spectrum of NDPM

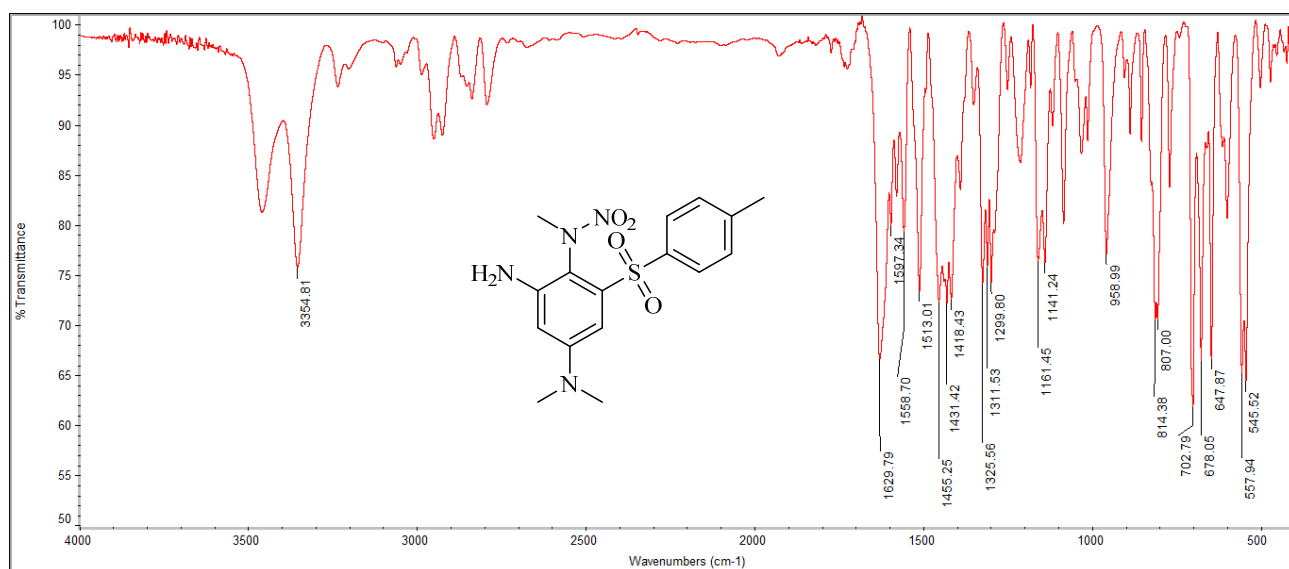

**Figure S9.** FT-IR spectrum of **2a**

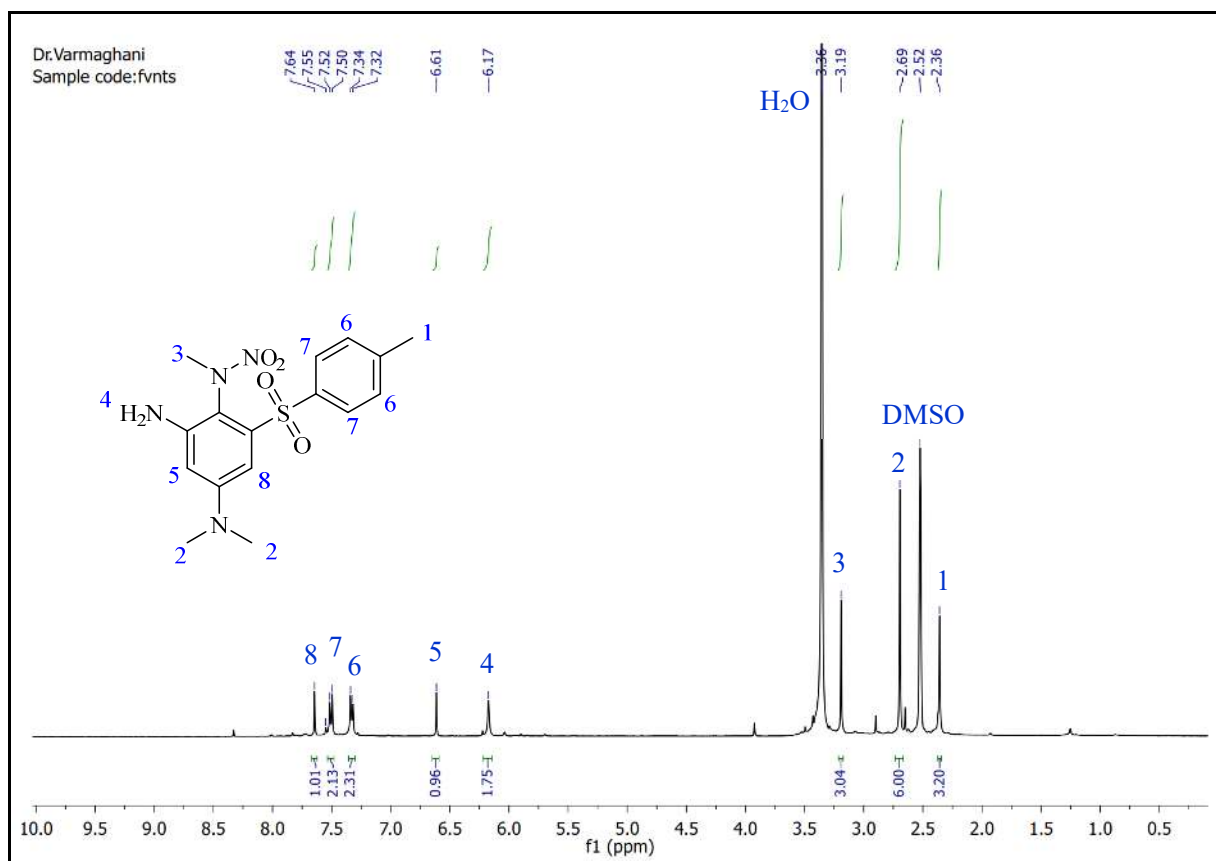

**Figure S10.** <sup>1</sup>H NMR spectrum of **2a**

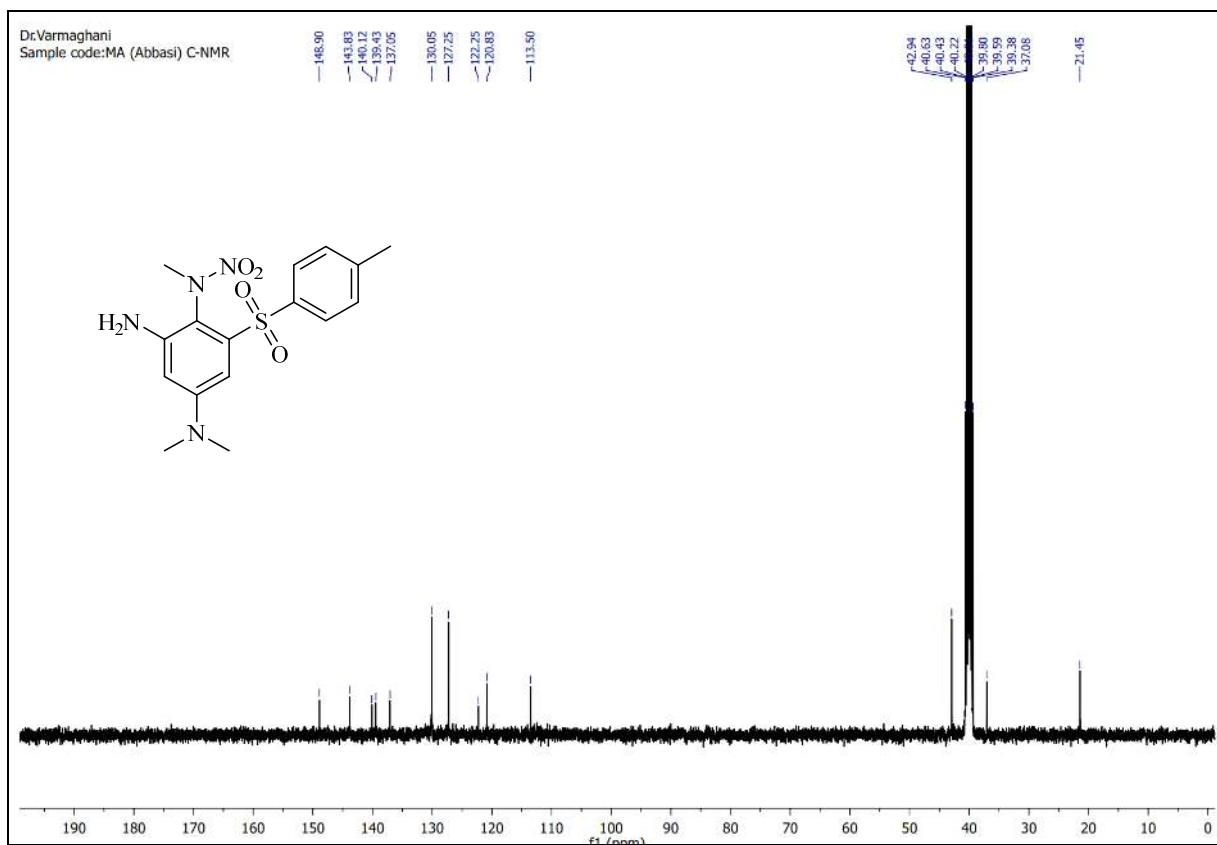

Figure S11.  $^{13}\text{C}$  NMR spectrum of **2a**

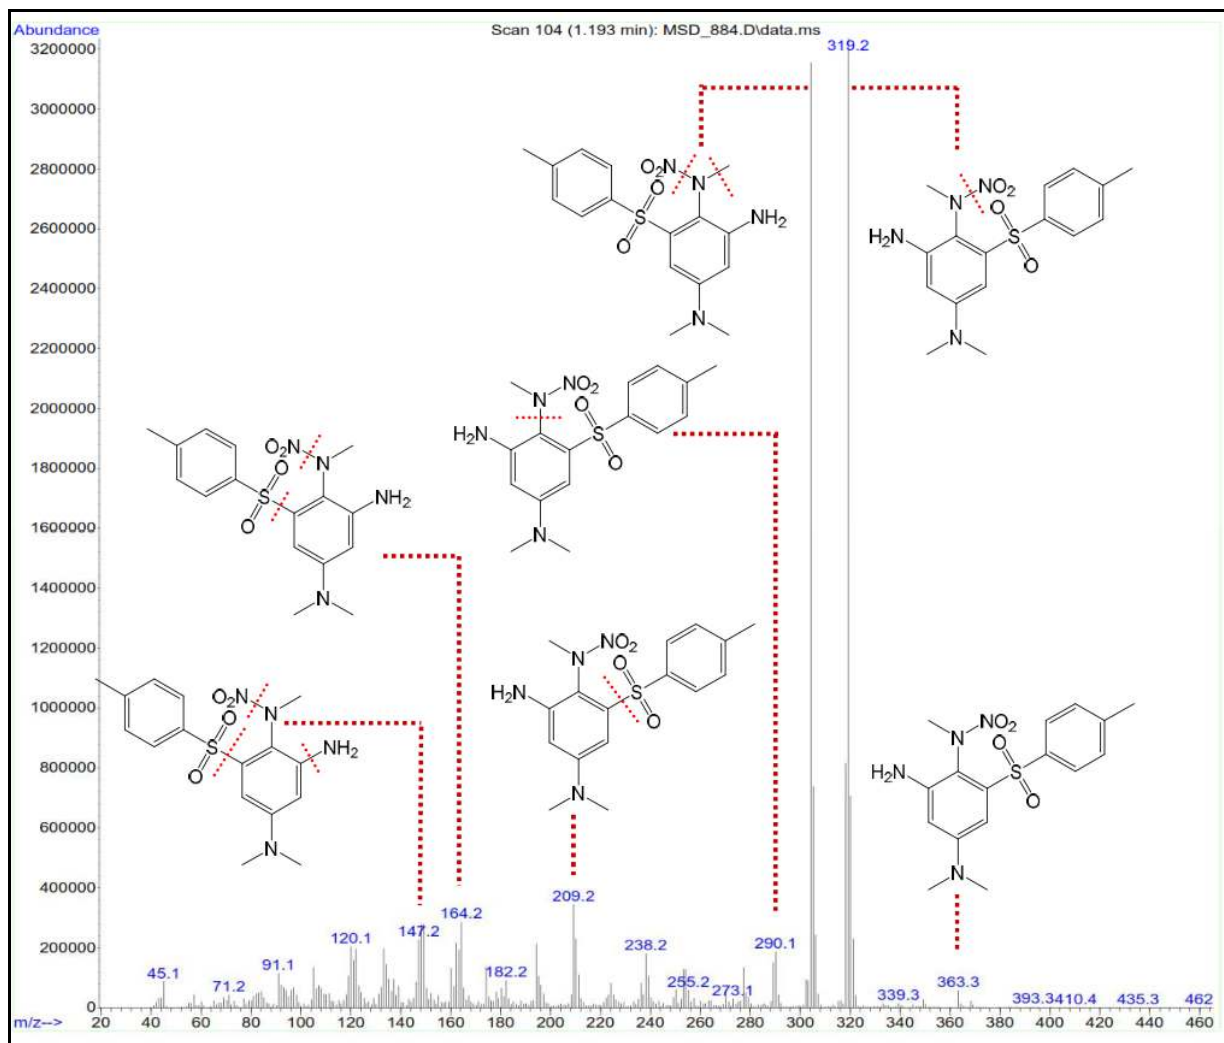

Figure S12. Mass spectrum of 2a

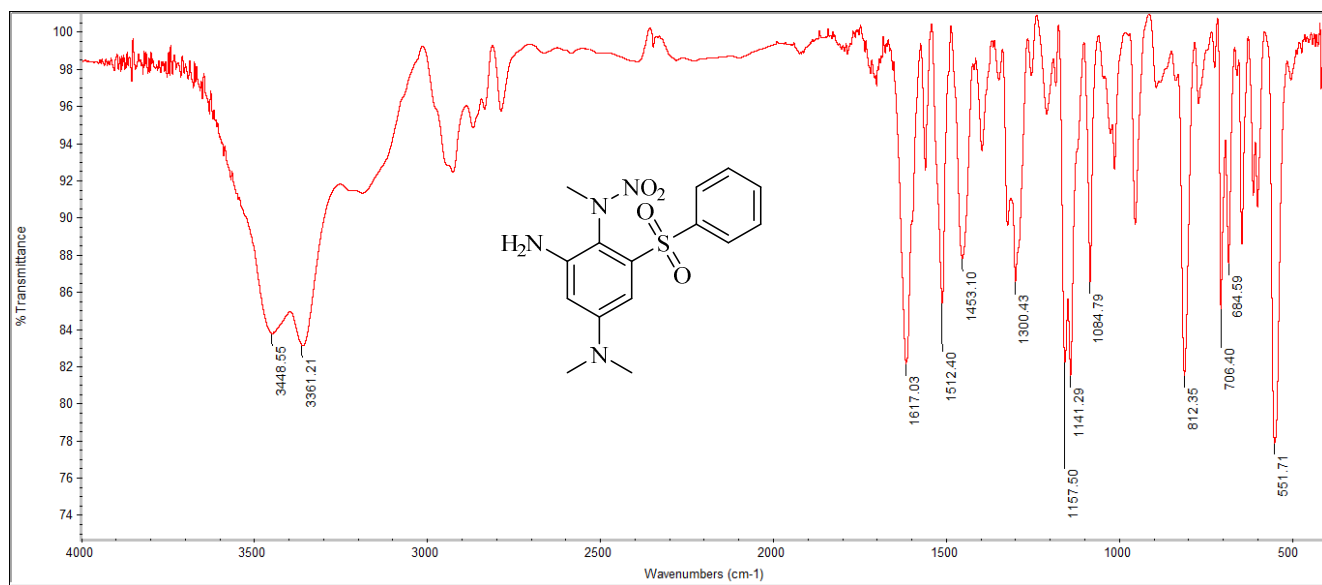

**Figure S13.** FT-IR spectrum of **2b**

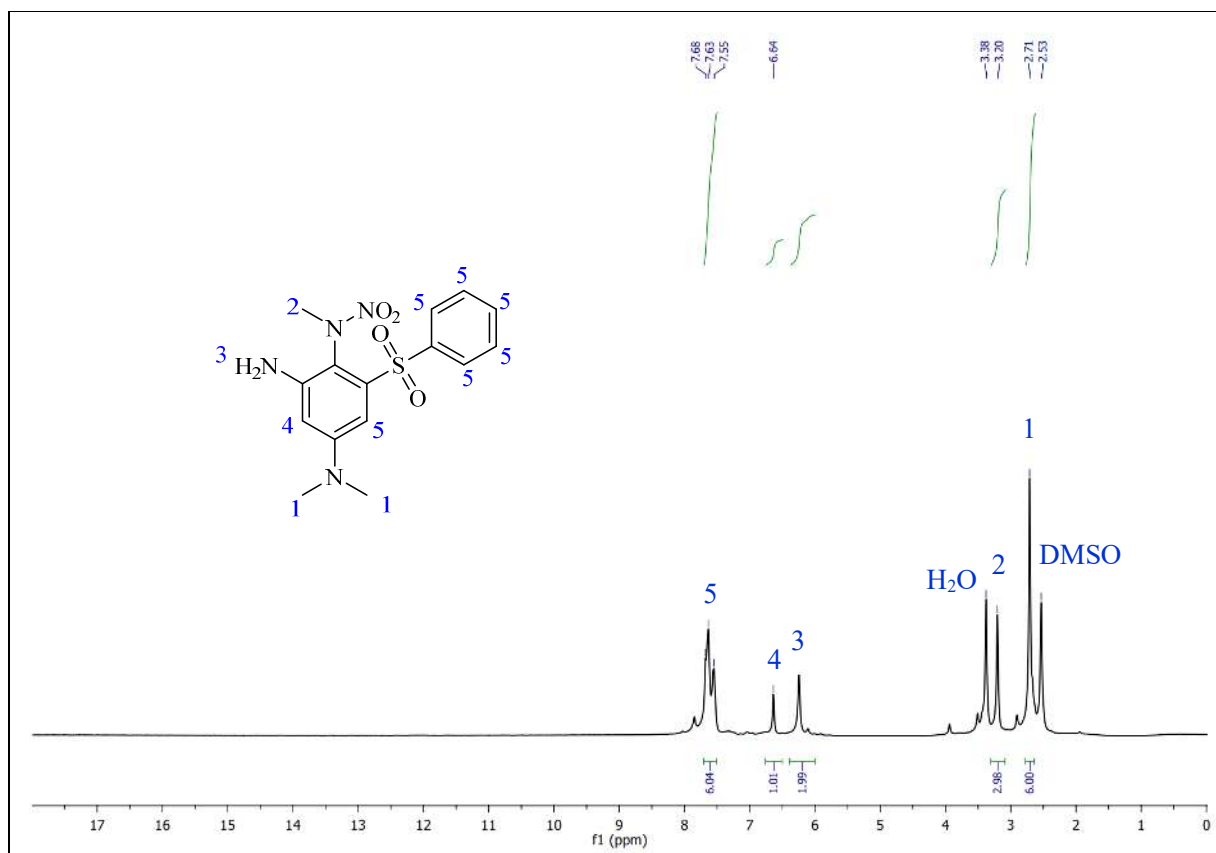

**Figure S14.**  $^1\text{H}$  NMR spectrum of **2b**



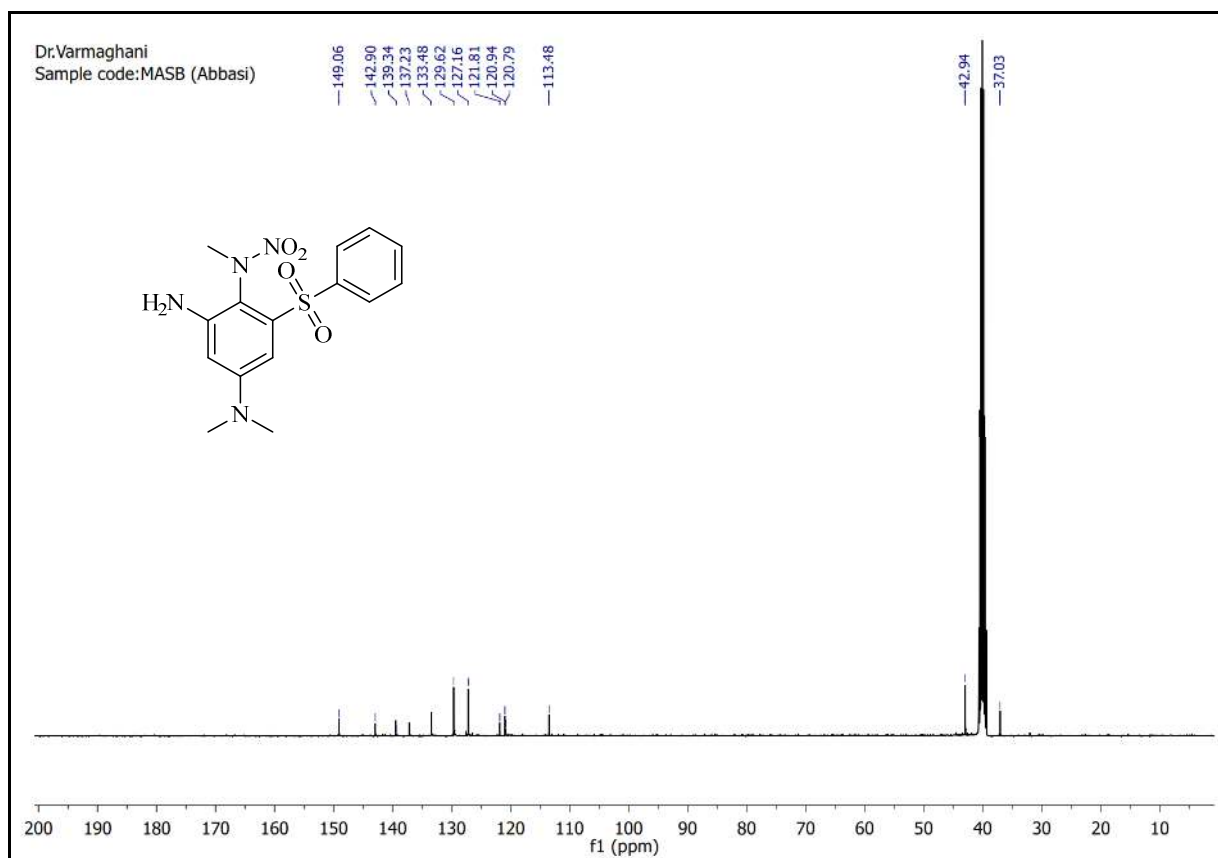

**Figure S15.**  $^{13}\text{C}$  NMR spectrum of **2b**

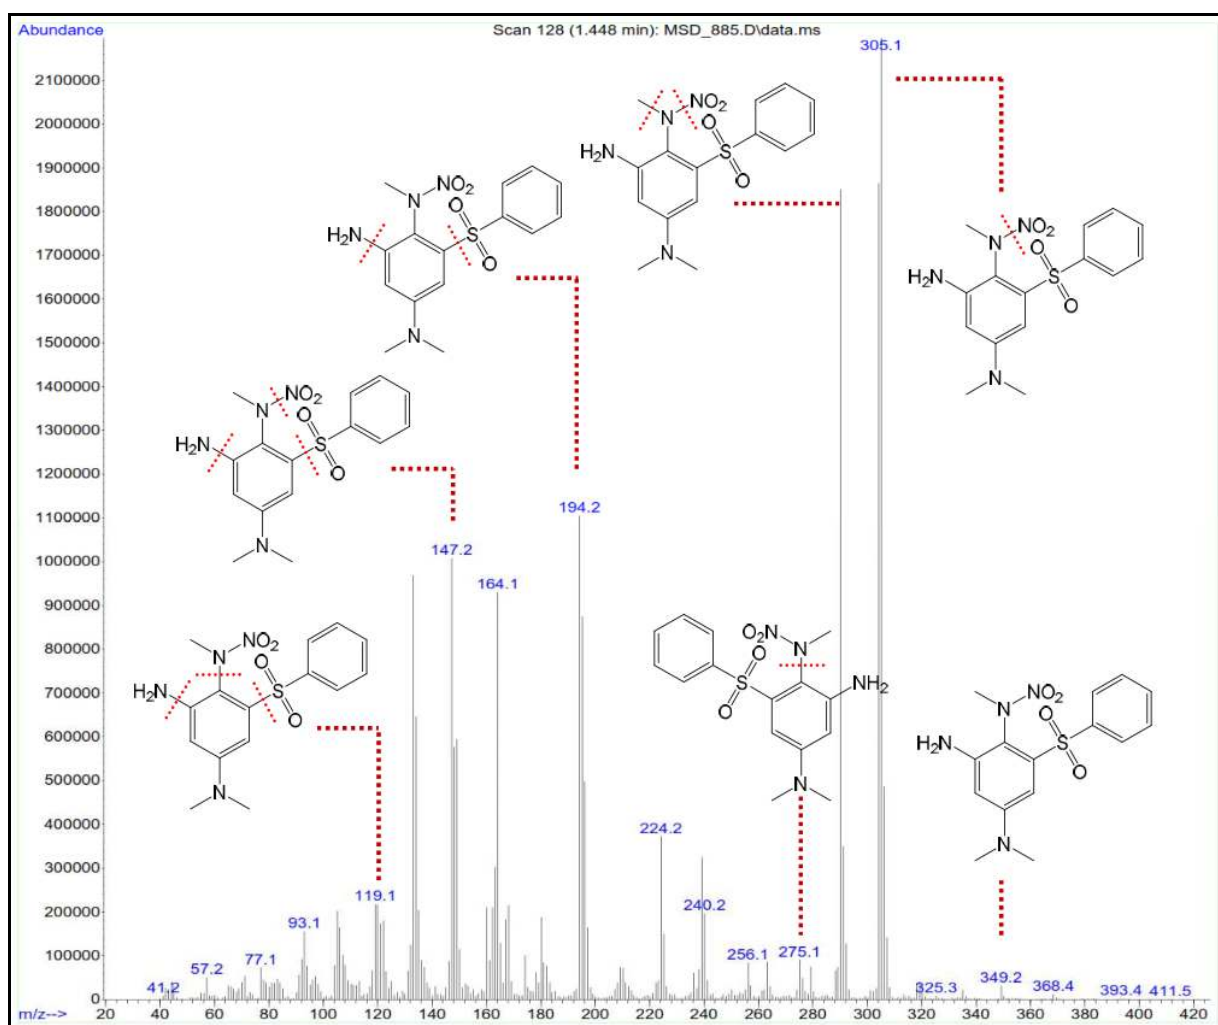

Figure S16. Mass spectrum of 2b

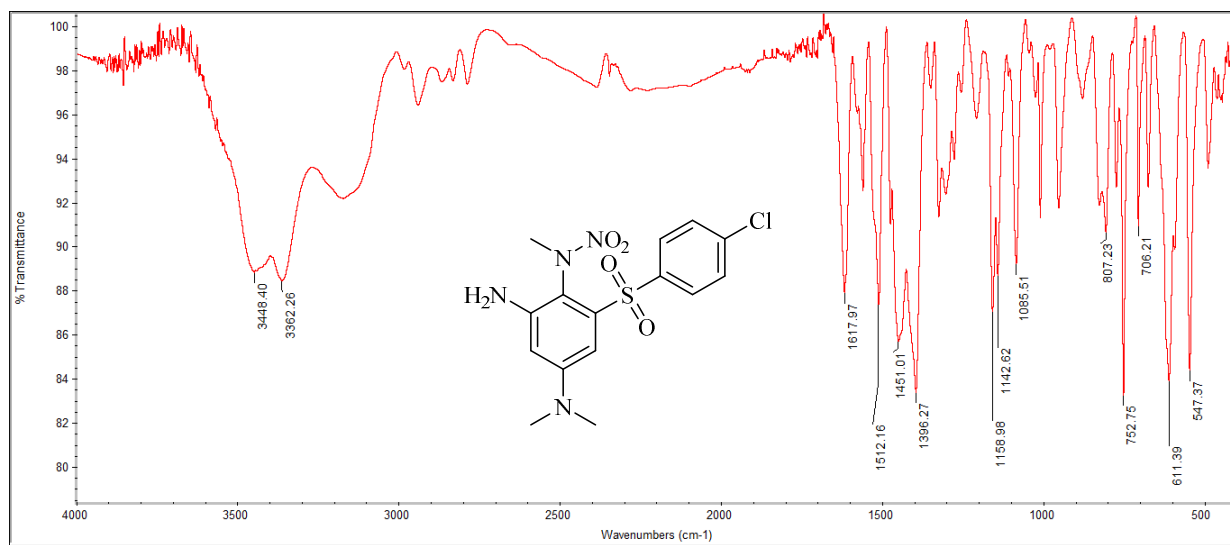

**Figure S17.** FT-IR spectrum of **2c**

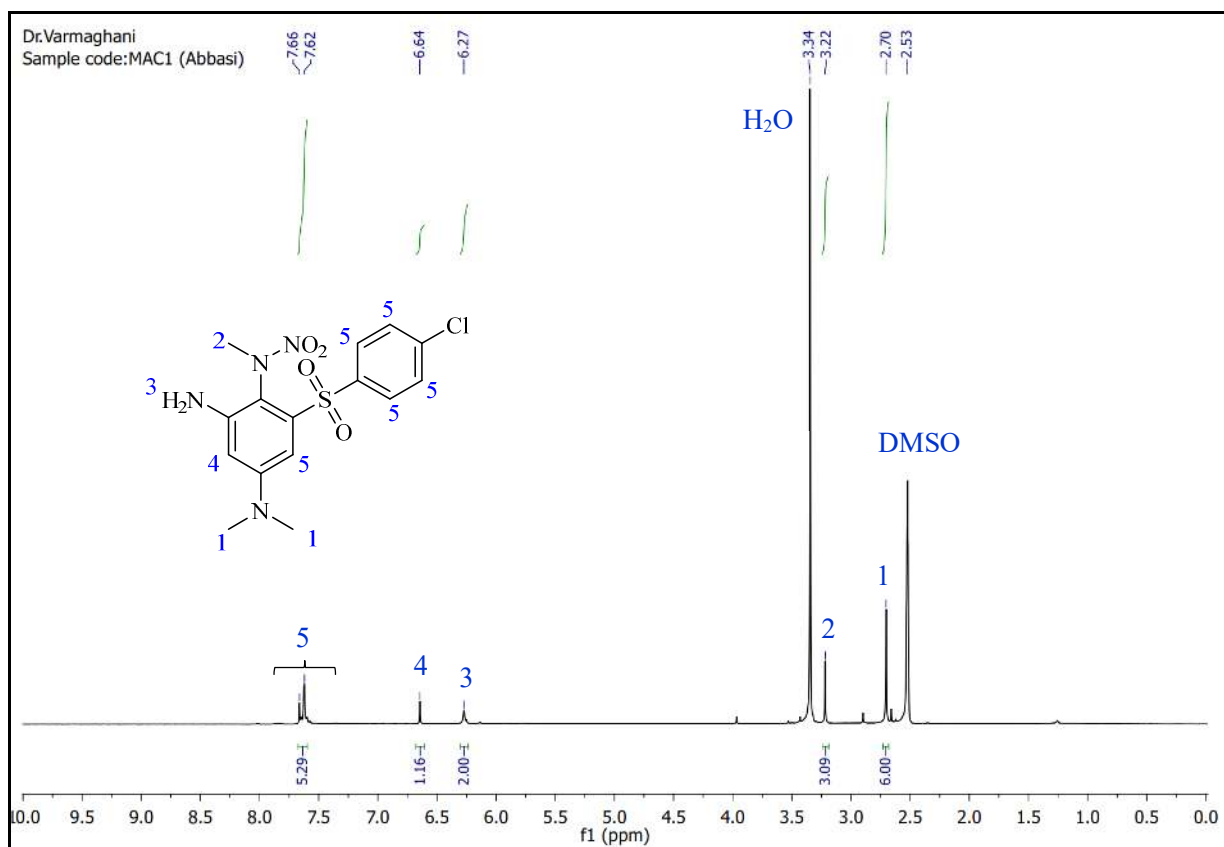

**Figure S18.** <sup>1</sup>H NMR spectrum of **2c**

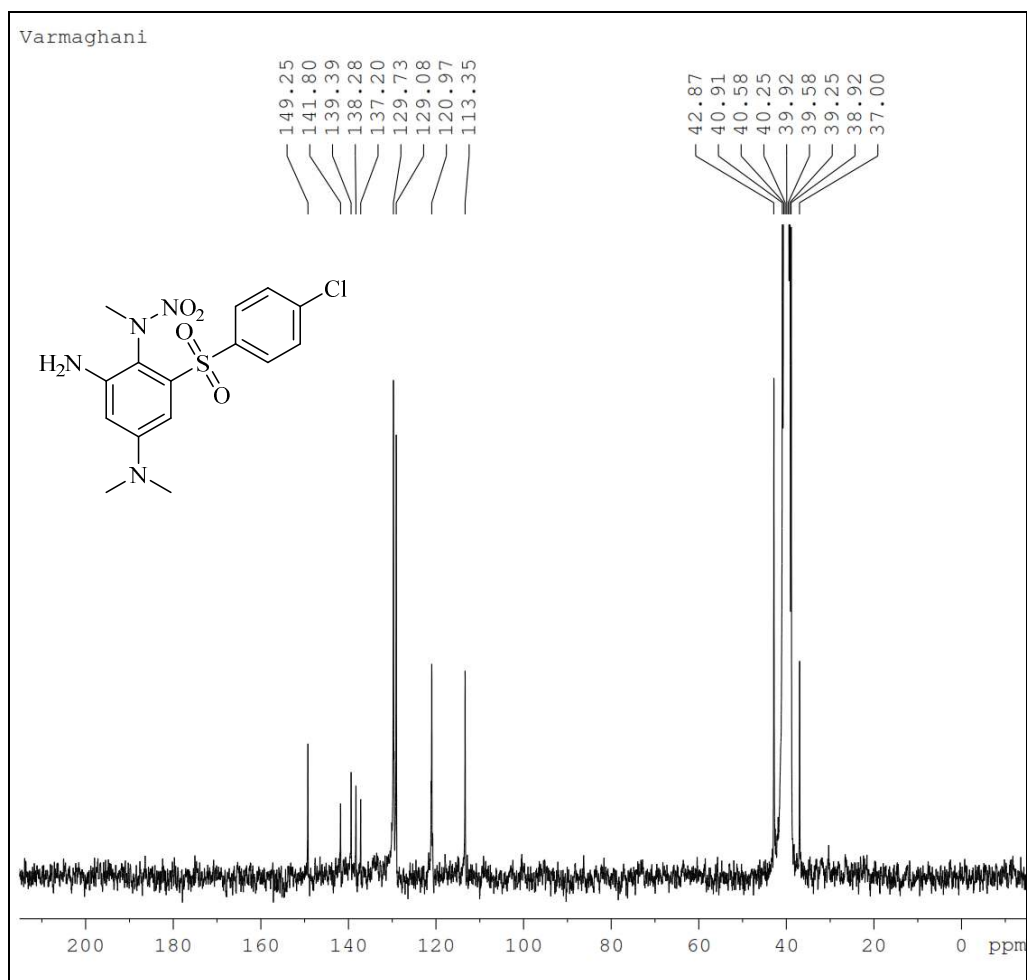

Figure S19.  $^{13}\text{C}$  NMR spectrum of **2c**

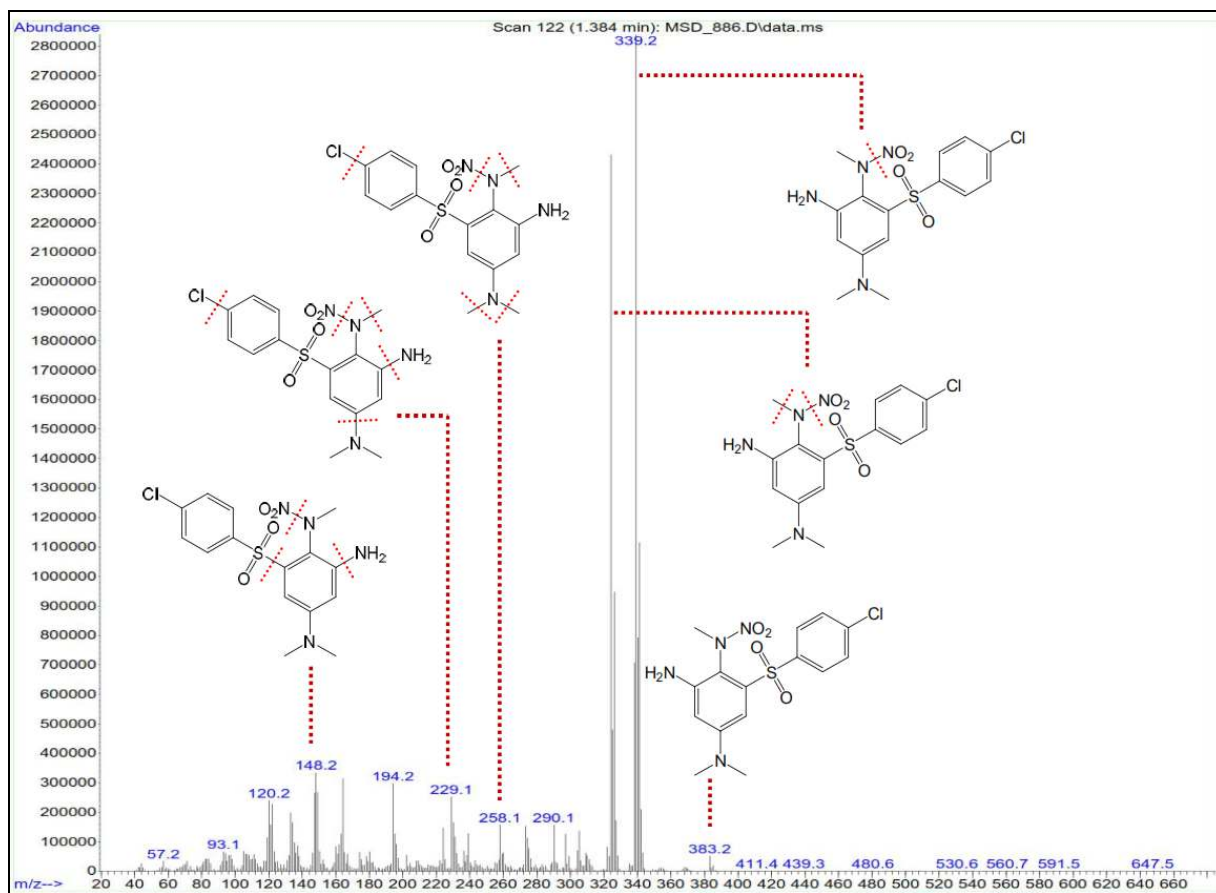

Figure S20. Mass spectrum of 2c
